# Supplementary material for: High yield and greener C–H difluoromethylation reactions using copper iodide nanoparticles/boron nitride nanosheets as a versatile and recyclable heterogeneous catalyst
Source: Royal Society of Chemistry journal article supplement (doi:10.1039/d1re00196e), 2021-01-01
Supplement: d1re00196e1.pdf [file d1re00196e1.pdf]

|    |                                                                                                    |    |
|----|----------------------------------------------------------------------------------------------------|----|
| 1  | <sup>1</sup> H and <sup>13</sup> C NMR spectra for 2-(difluoromethyl)-5-nitrobenzothiazole.        | 8  |
| 2  | <sup>1</sup> H and <sup>13</sup> C NMR spectra for 2-(difluoromethyl)-5-methylbenzoxazole.         | 9  |
| 3  | <sup>1</sup> H and <sup>13</sup> C NMR spectra for (3,3-difluoroprop-1-yn-1-yl)benzene.            | 10 |
| 4  | <sup>1</sup> H and <sup>13</sup> C NMR spectra for 4-(3,3-difluoroprop-1-yn-1-yl)aniline.          | 11 |
| 5  | <sup>1</sup> H and <sup>13</sup> C NMR spectra for 1-(3,3-difluoroprop-1-yn-1-yl)-4-methylbenzene. | 12 |
| 6  | <sup>1</sup> H and <sup>13</sup> C NMR spectra for 1-bromo-4-(3,3-difluoroprop-1-yn-1-yl)benzene.  | 13 |
| 7  | <sup>1</sup> H and <sup>13</sup> C NMR spectra for 1-(3,3-difluoroprop-1-yn-1-yl)-4-nitrobenzene.  | 14 |
| 8  |                                                                                                    |    |
| 9  |                                                                                                    |    |
| 10 |                                                                                                    |    |
| 11 |                                                                                                    |    |
| 12 |                                                                                                    |    |
| 13 |                                                                                                    |    |
| 14 |                                                                                                    |    |
| 15 |                                                                                                    |    |
| 16 |                                                                                                    |    |
| 17 |                                                                                                    |    |
| 18 |                                                                                                    |    |
| 19 |                                                                                                    |    |
| 20 |                                                                                                    |    |
| 21 |                                                                                                    |    |
| 22 |                                                                                                    |    |
| 23 |                                                                                                    |    |

# 1 Comment on Fig. S1(e)

2 The molecular structure of 3 wt.% CuI/BNNs was further confirmed by FT-IR. The peaks located  
3 at wavenumber positions of  $\sim 1381\text{ cm}^{-1}$  and  $812\text{ cm}^{-1}$  relate to in-plane stretching and out-of-plane  
4 bending vibrational motions of B-N and B-N-B bonds, respectively. In addition, the peak located  
5 at a wavenumber position of  $\sim 3400\text{ cm}^{-1}$  relates to N-H or O-H stretching vibrational motions.<sup>1</sup>  
6

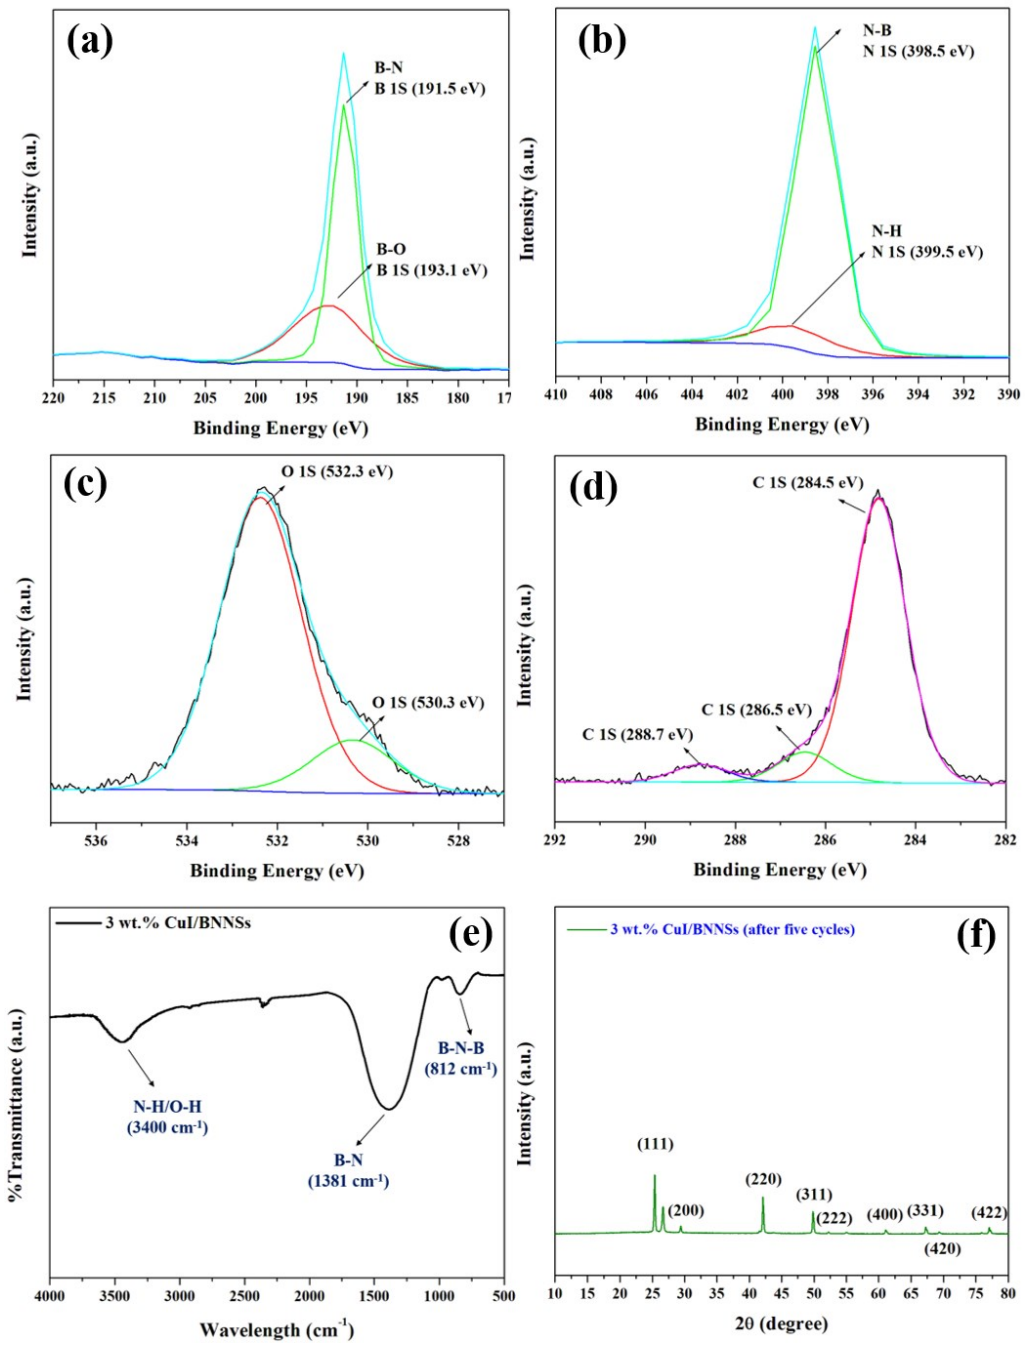

7

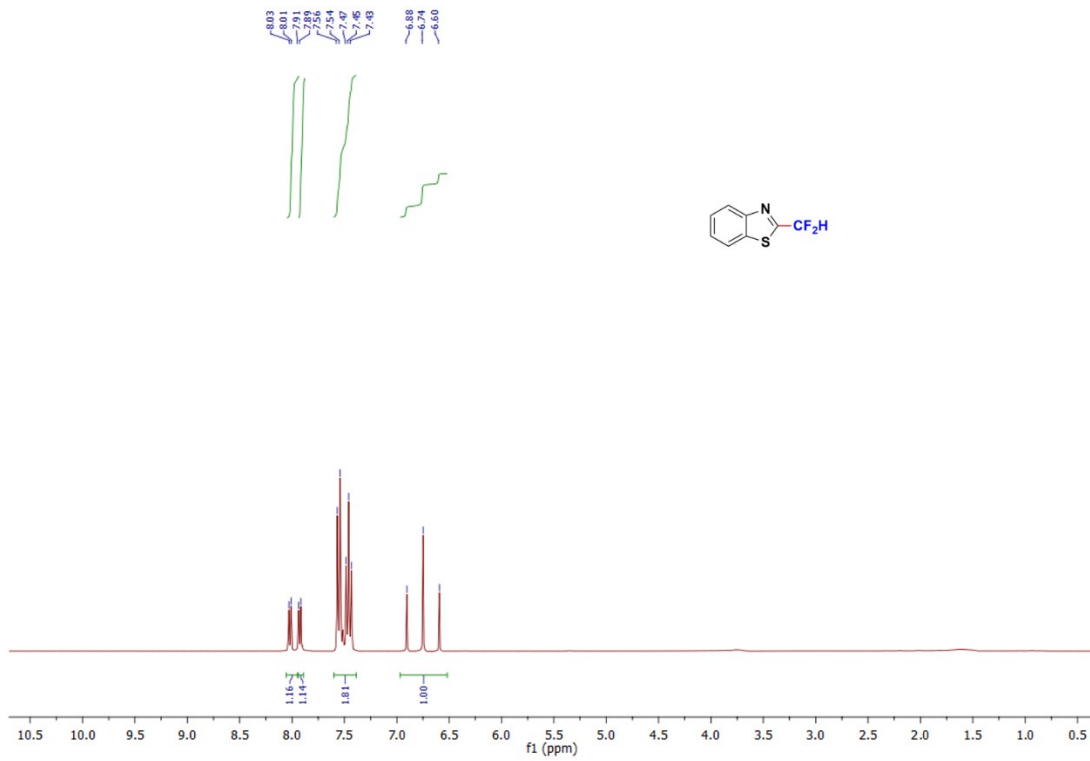

1

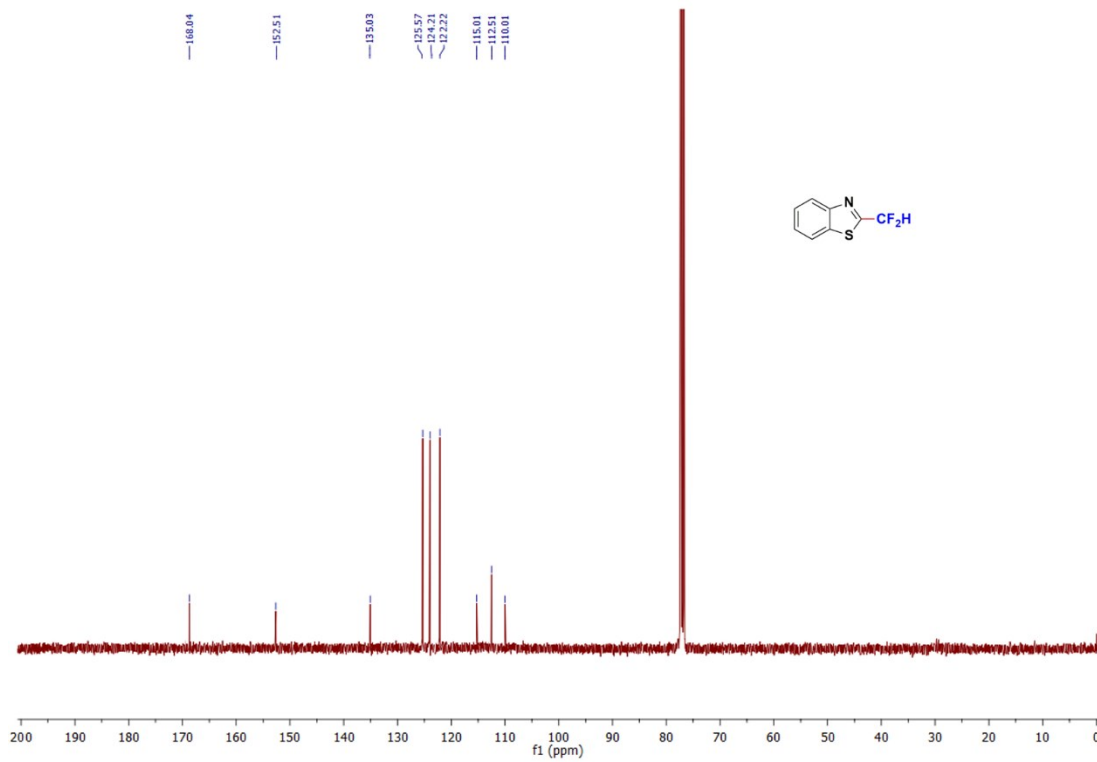

2

3

4

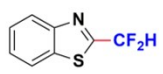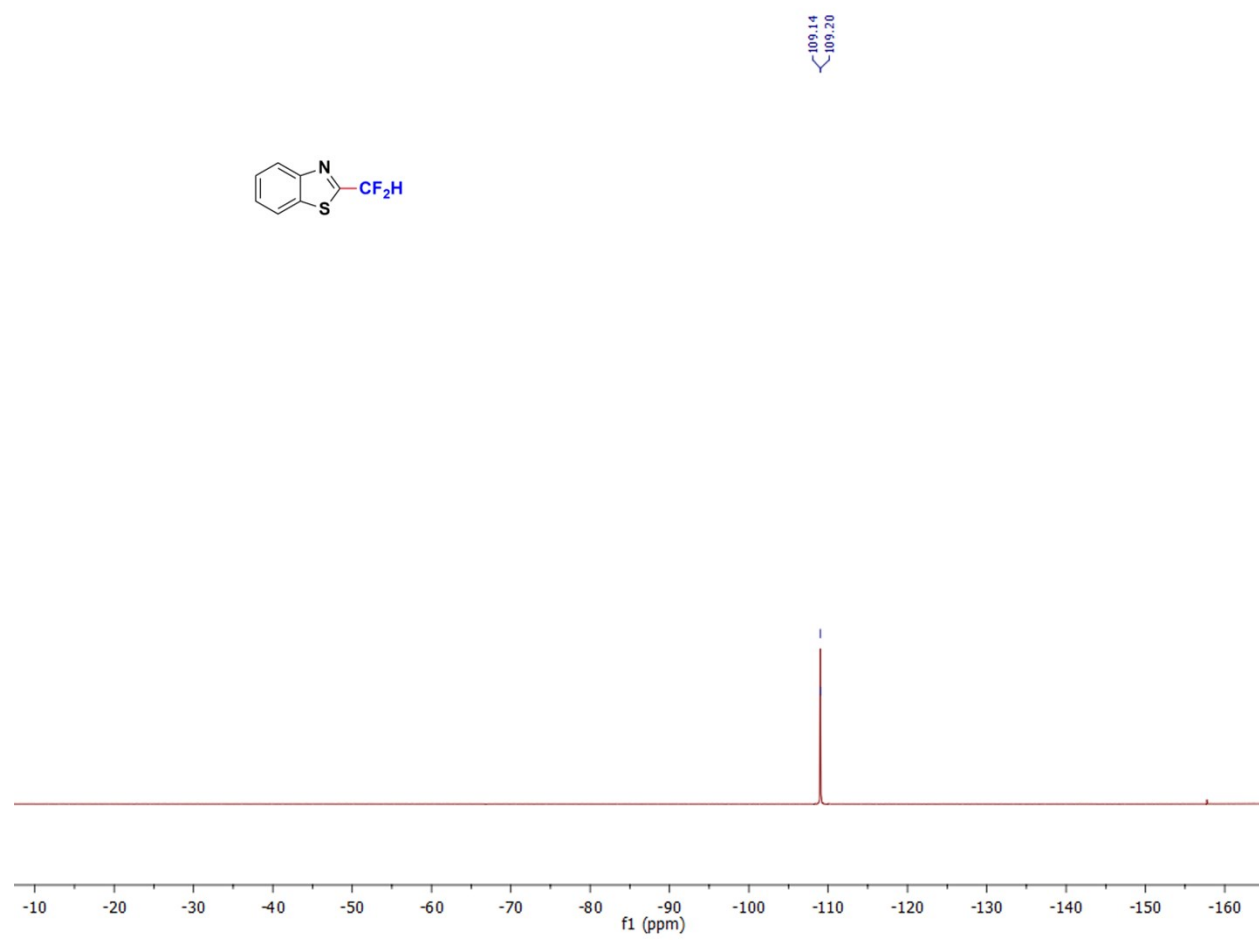

1  
2  
3

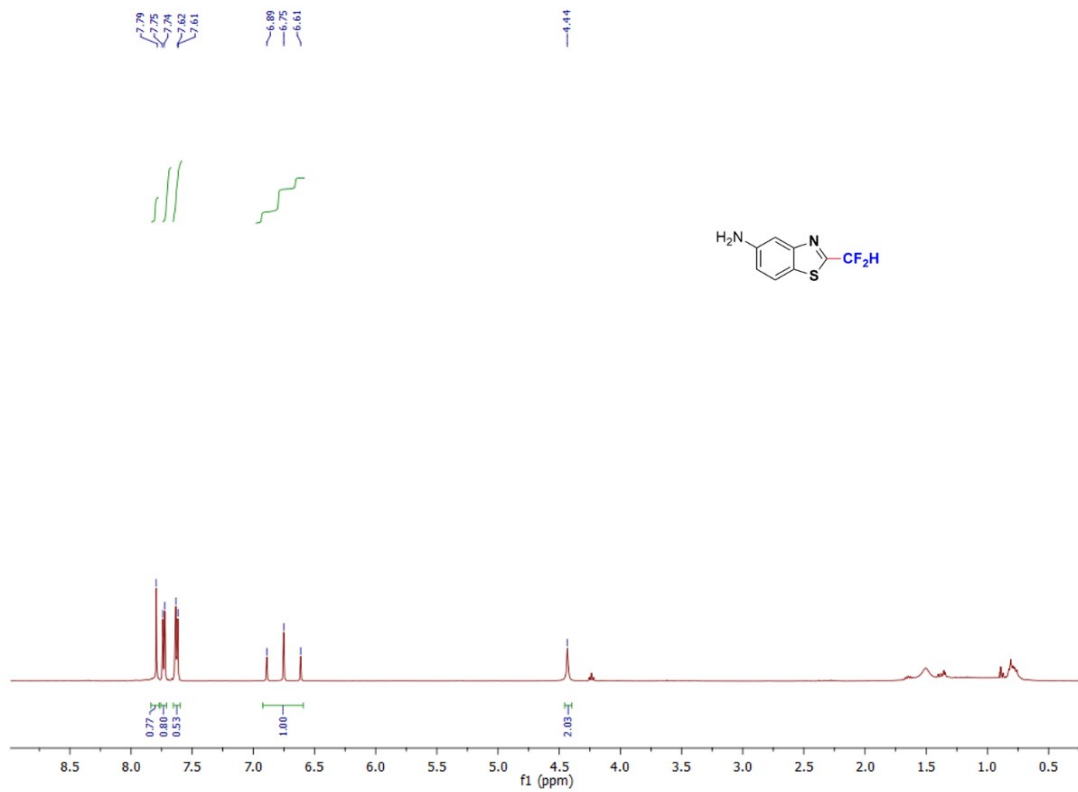

1

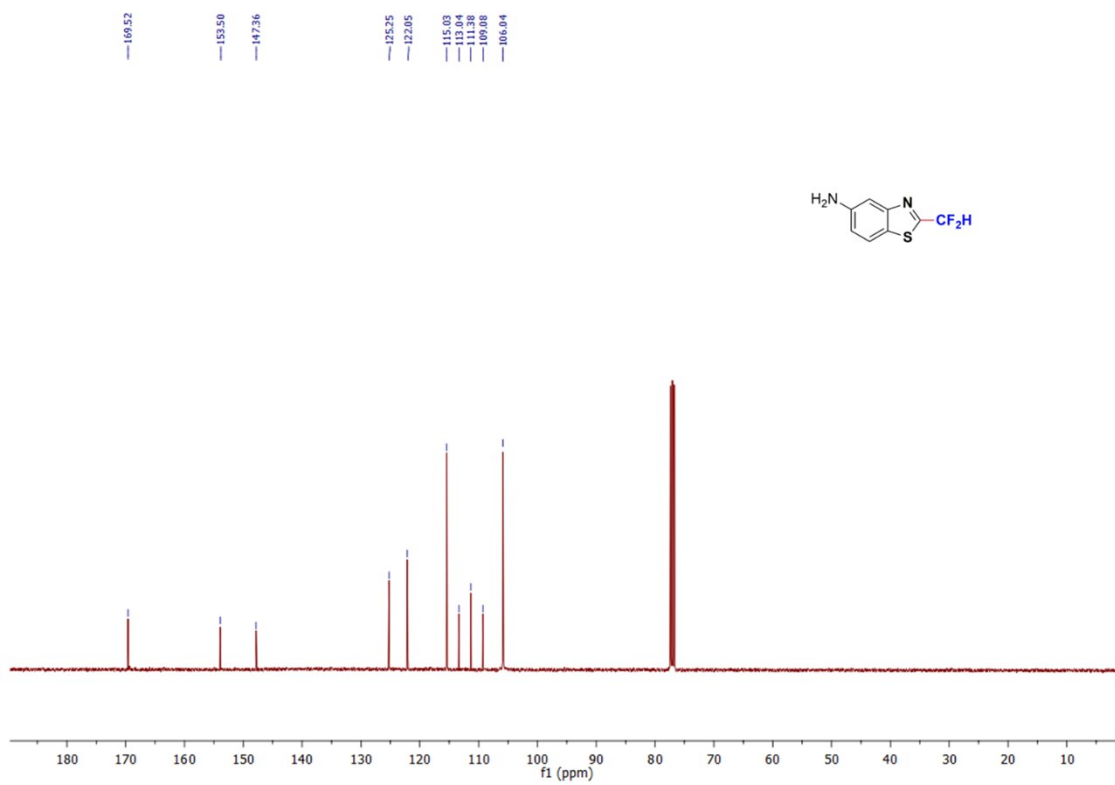

2

3

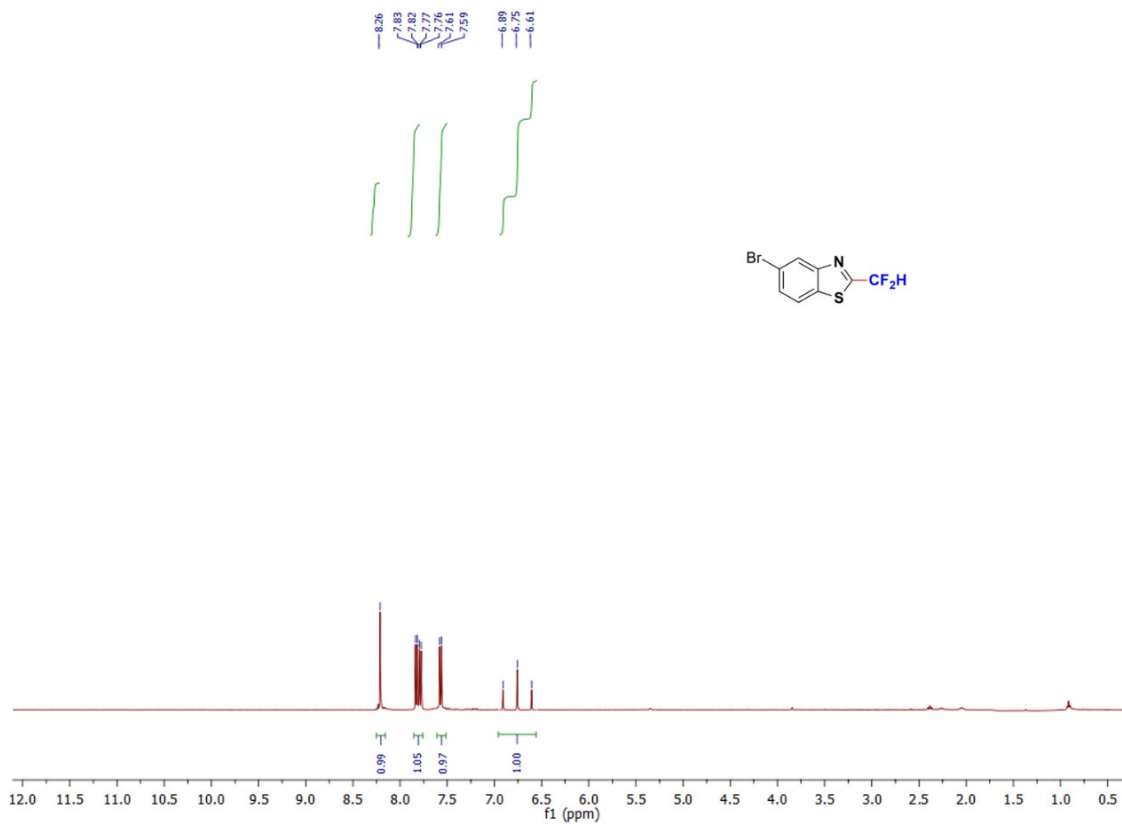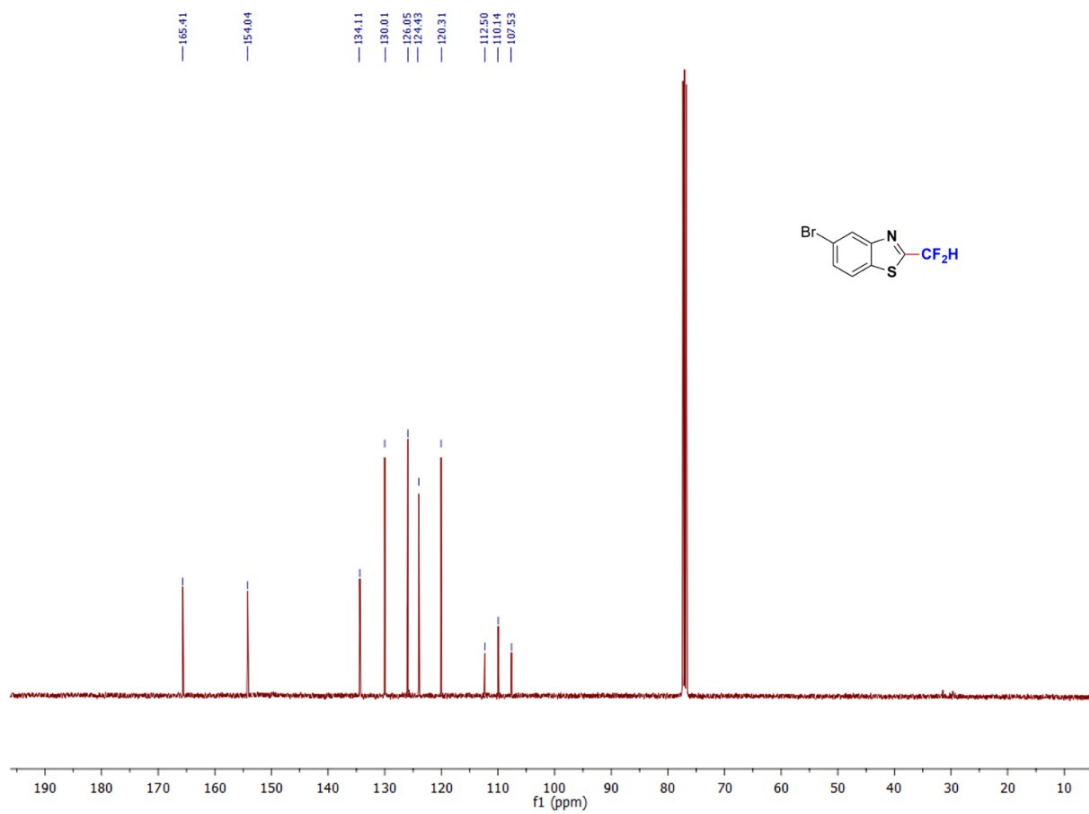

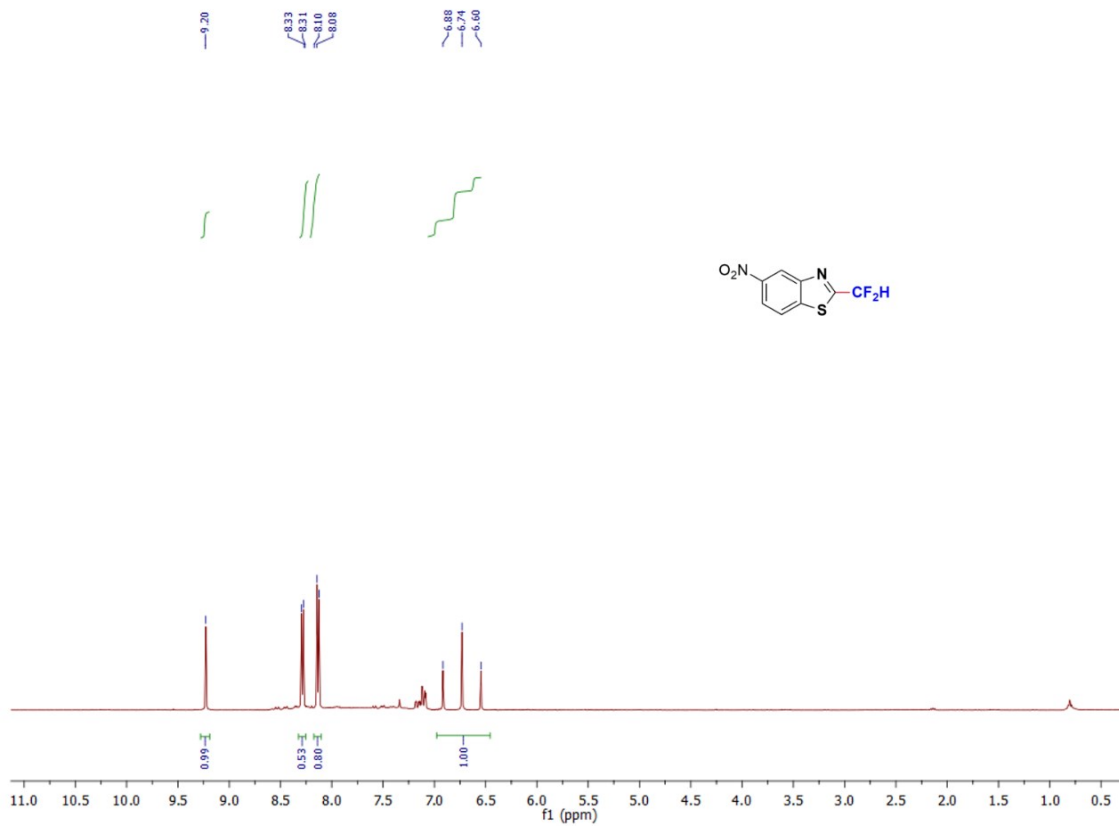

1

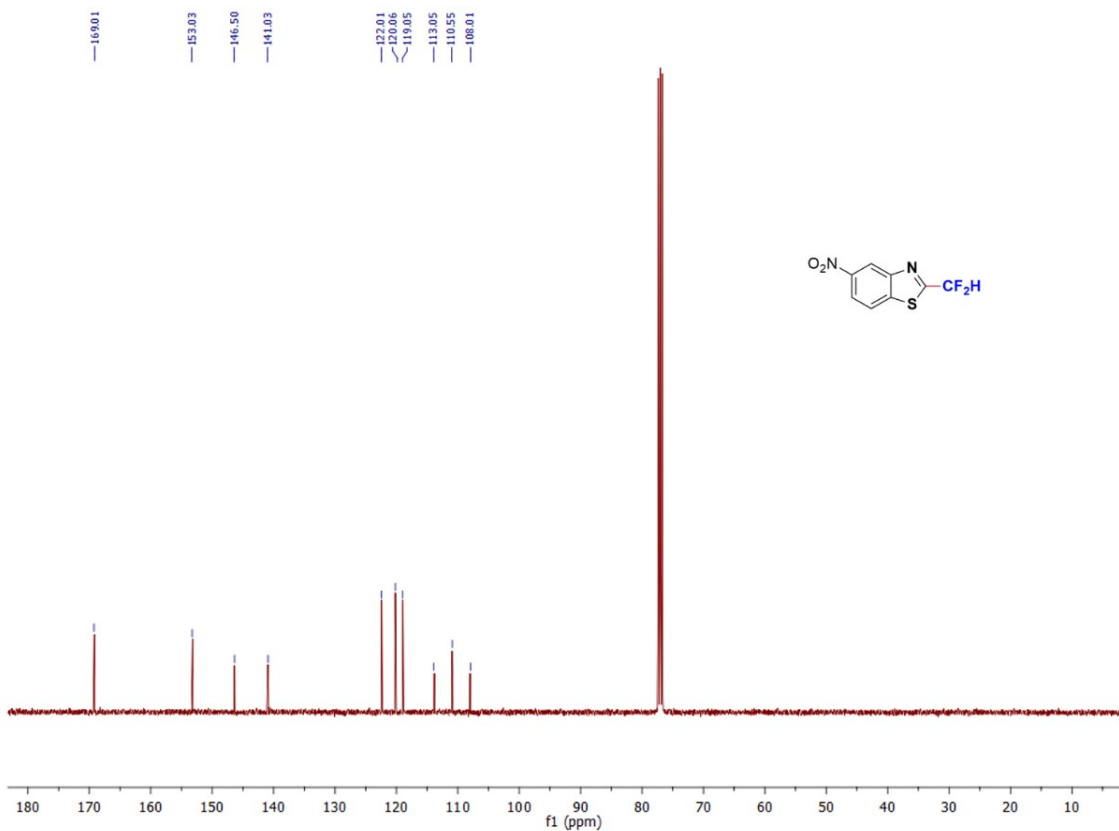

2



1

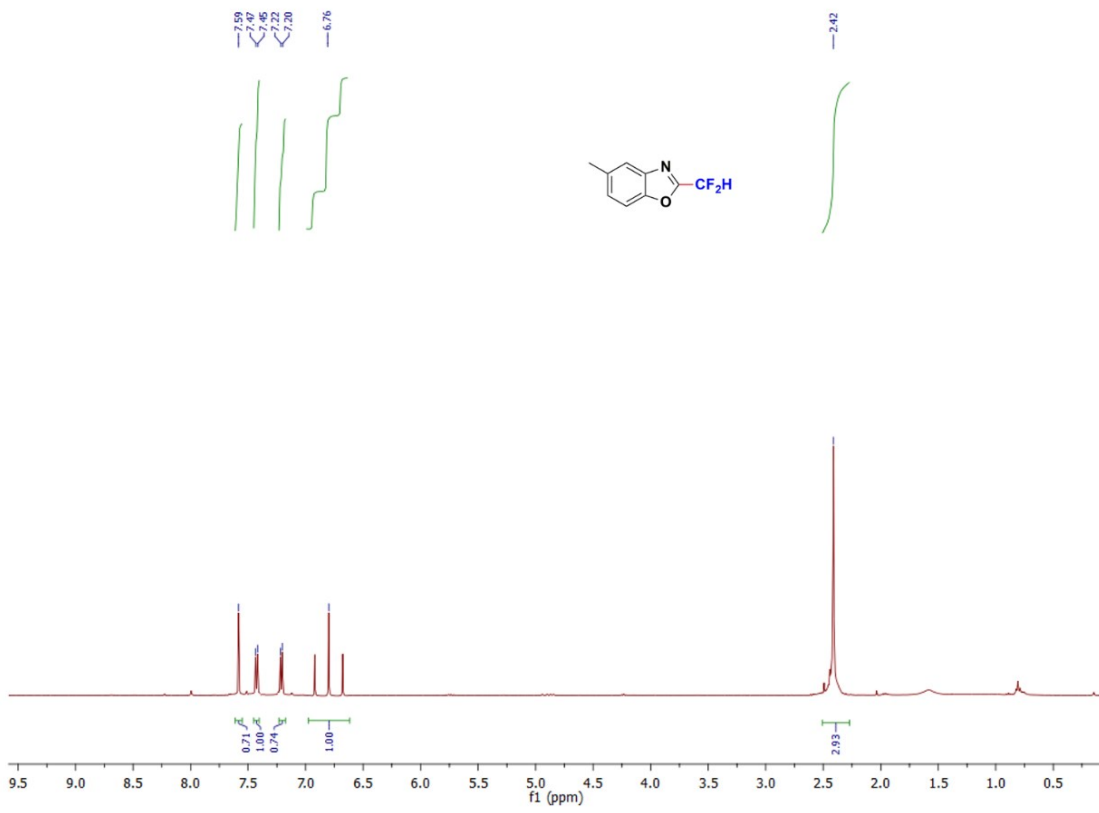

2

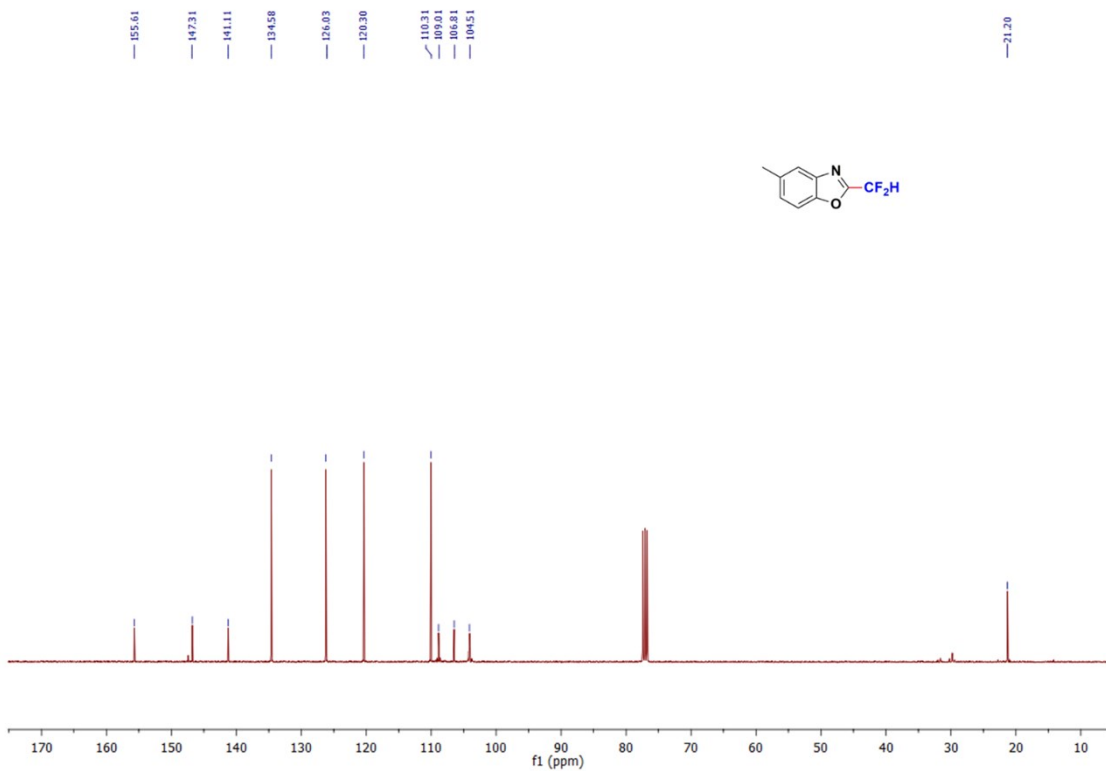

3

1

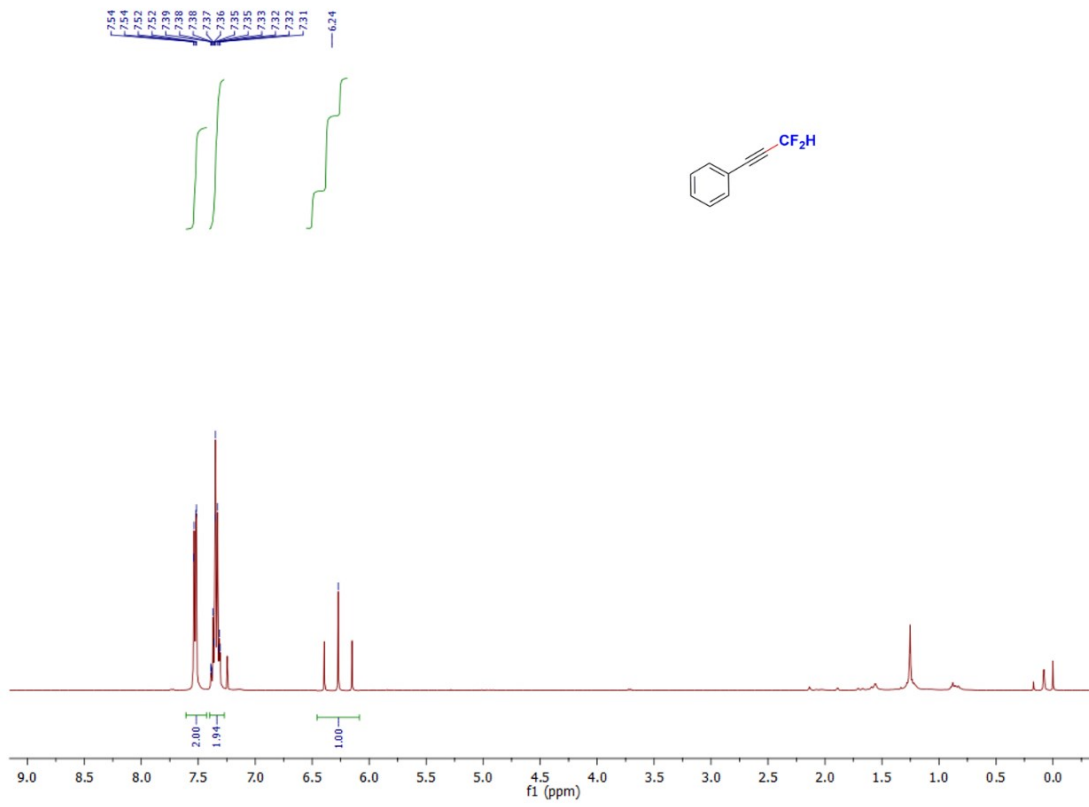

2

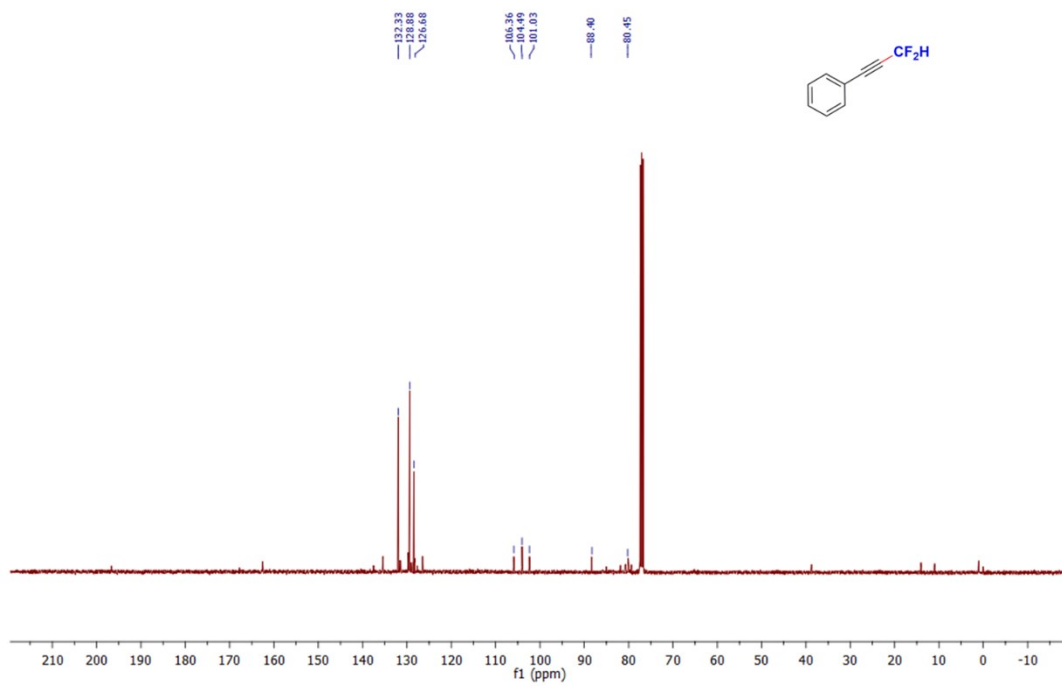

3

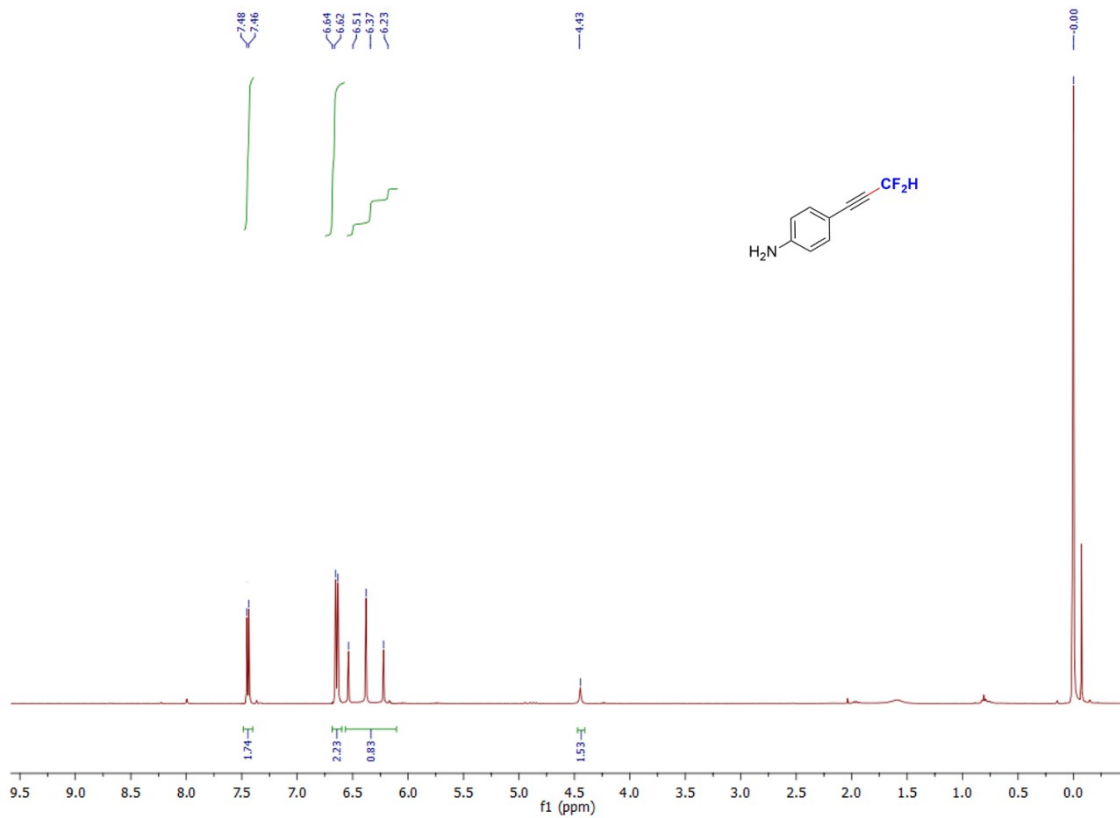

1

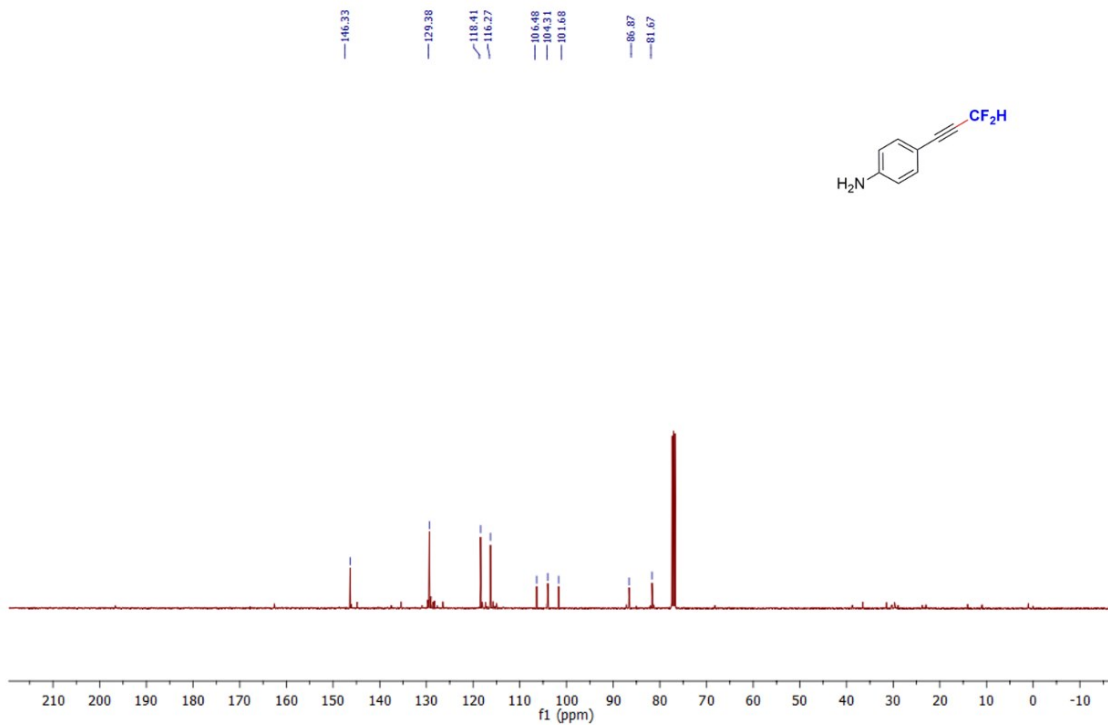

2

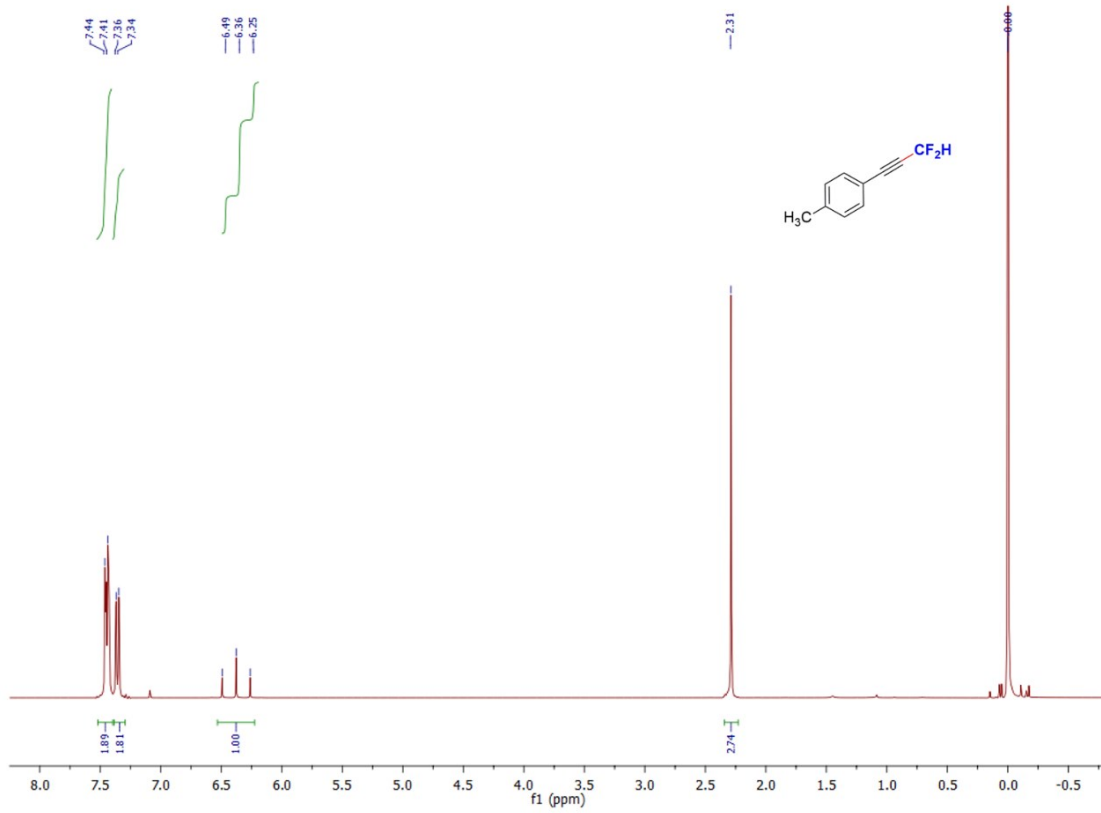

1

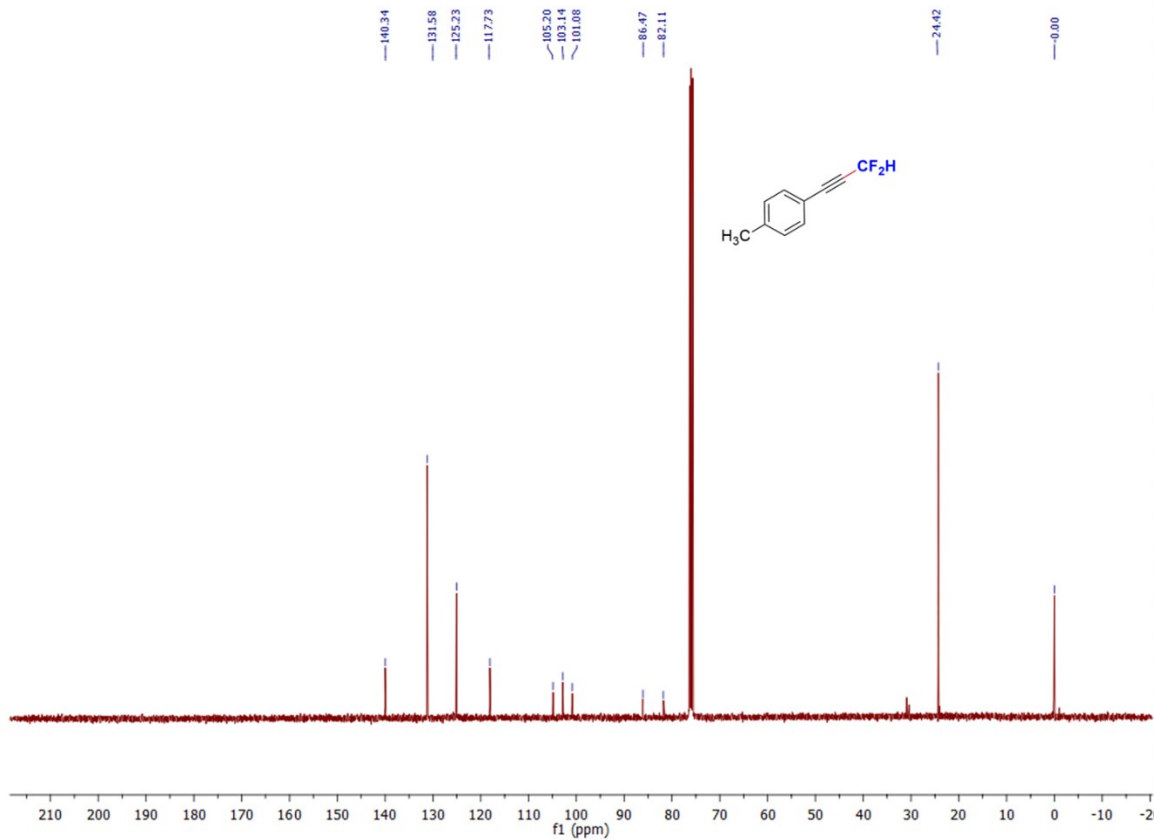

2

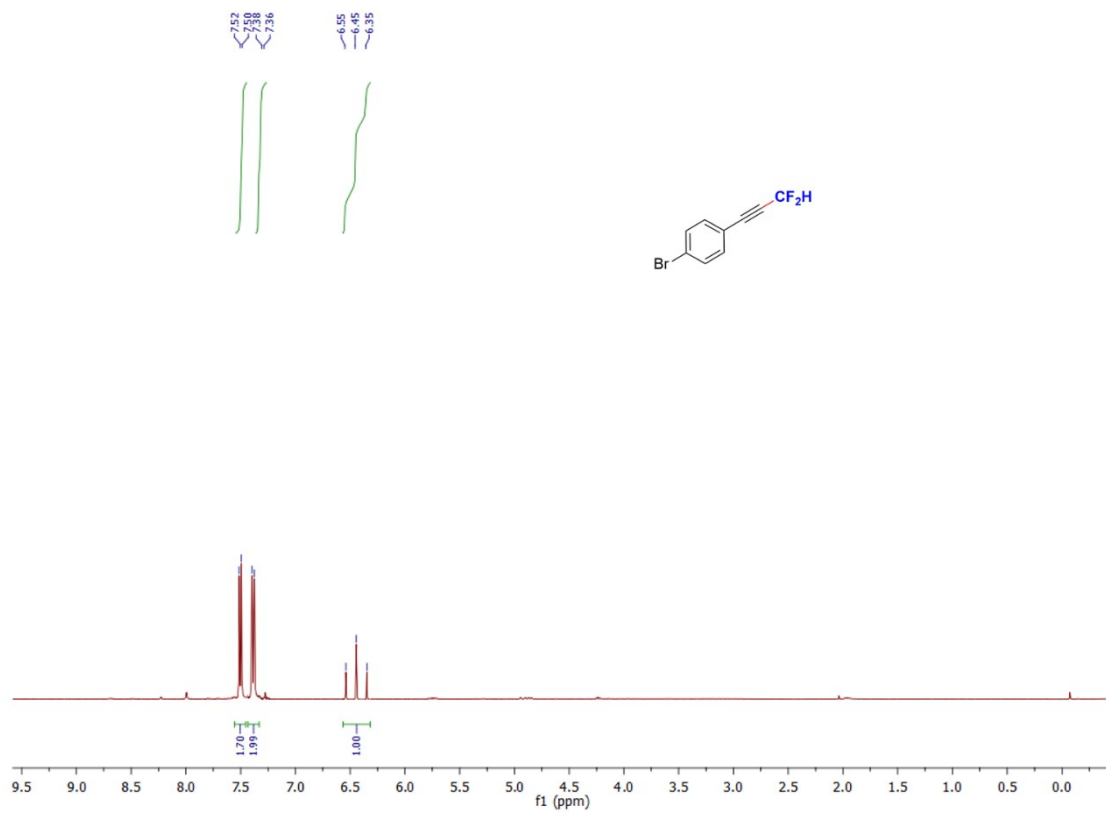

1

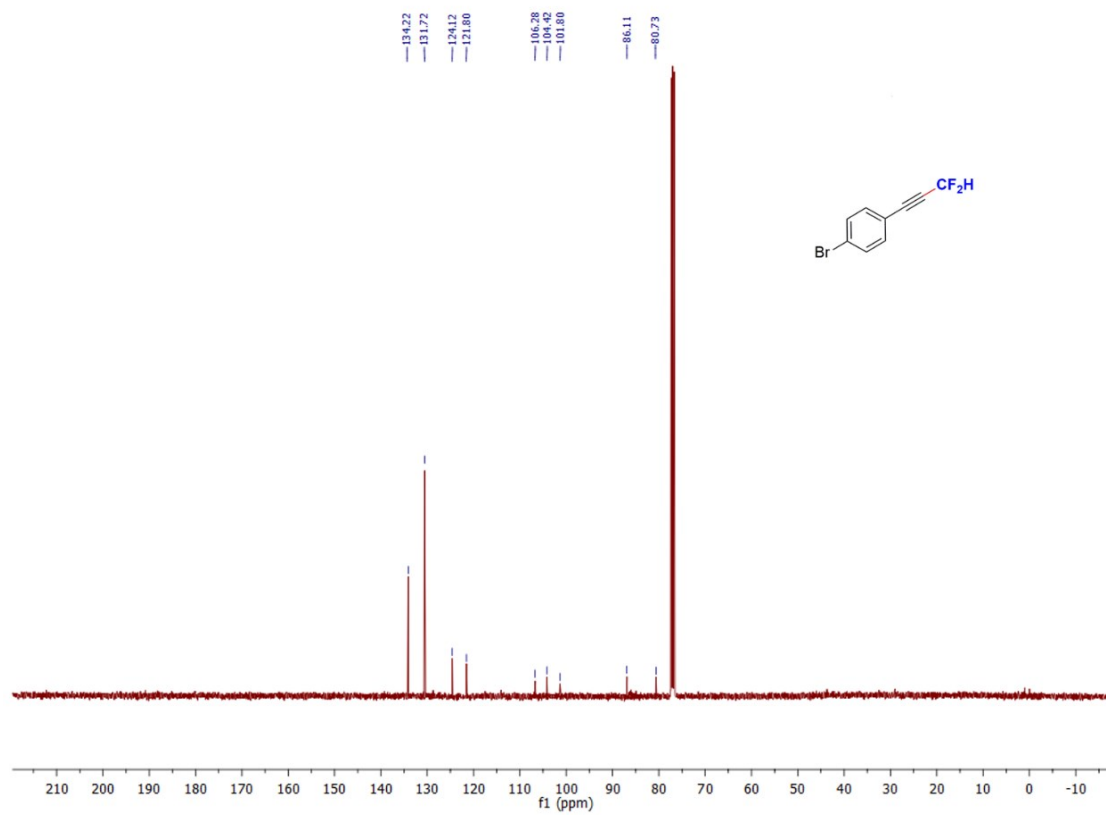

2

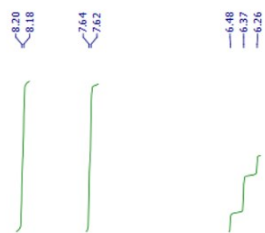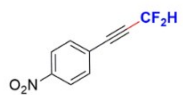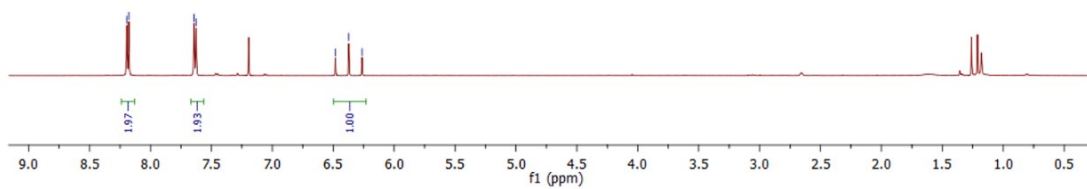

1

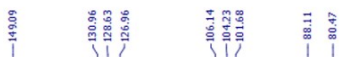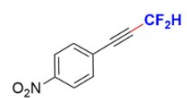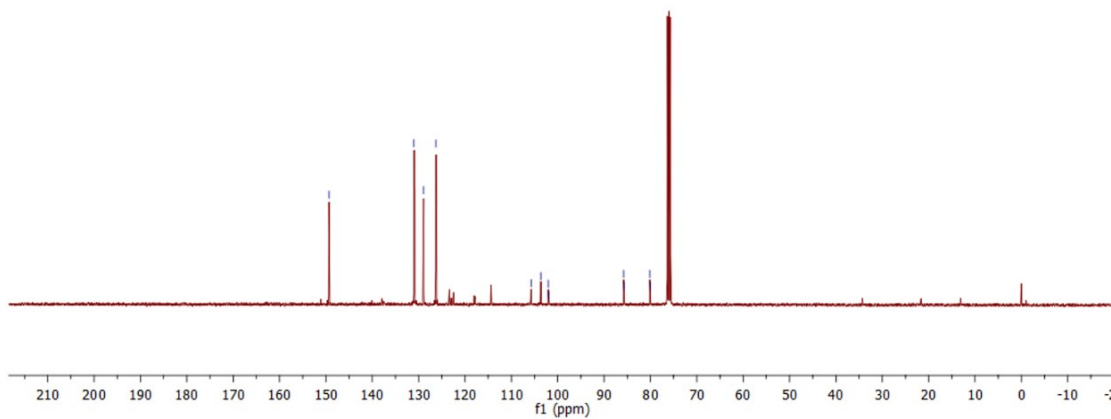

2

## 1 References

1. B. Zhang, Q. Wu, H. Yu, C. Bulin, H. Sun, R. Li, X. Ge and R. Xing, High-Efficient Liquid Exfoliation of Boron Nitride Nanosheets Using Aqueous Solution of Alkanolamine, *Nanoscale Res. Lett.*, 2017, **12**, 596-602.

5

6
